# Supplementary material
Source: PubMed Central journal article supplement (PMC3957675)
Supplement: CVI.00359-13_zcd999094924so1.pdf [file CVI.00359-13_zcd999094924so1.pdf]

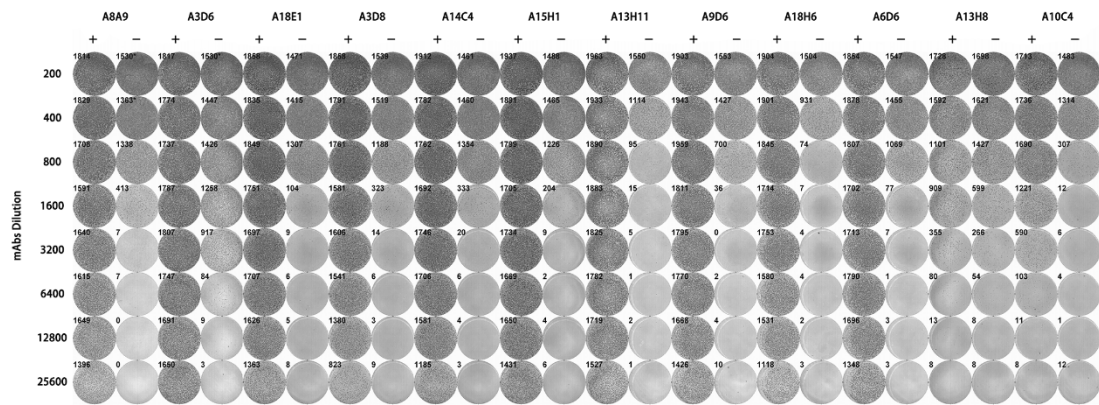

Fig. S1. The selection of a high-affinity mAb for the modified ELISPOT assay.

Used as the detection antibody of the modified ELISPOT assay, 29 mAbs' reactivities with the CVB3-infected RD cells and the normal RD cells were evaluated. The infectious dose is 30,000 TCID<sub>50</sub>/well and the incubation time is 12 hours. Only partial data are shown here. "+" represents the wells that was infected with CVB3. "-" represents the negative wells. The number in the upper left corner of each well indicates the number of spots calculated by the ImmunoSpot Image analyzer. The first 10 mAbs are the mAbs that have good reactivity with CVB3-infected cells. The penultimate mAb A6D6 represents the class of mAbs that cannot label CVB3-infected cells specifically. The last mAb A10C4 represents the class of mAbs that have poor reactivity with CVB3-infected cells.
